# Supplementary figures and images for: Physicochemical properties, pharmacokinetics, toxicology and application of nanocarriers
Source: Royal Society of Chemistry journal article supplement (doi:10.1039/d2tb02001g), 2022-11-29

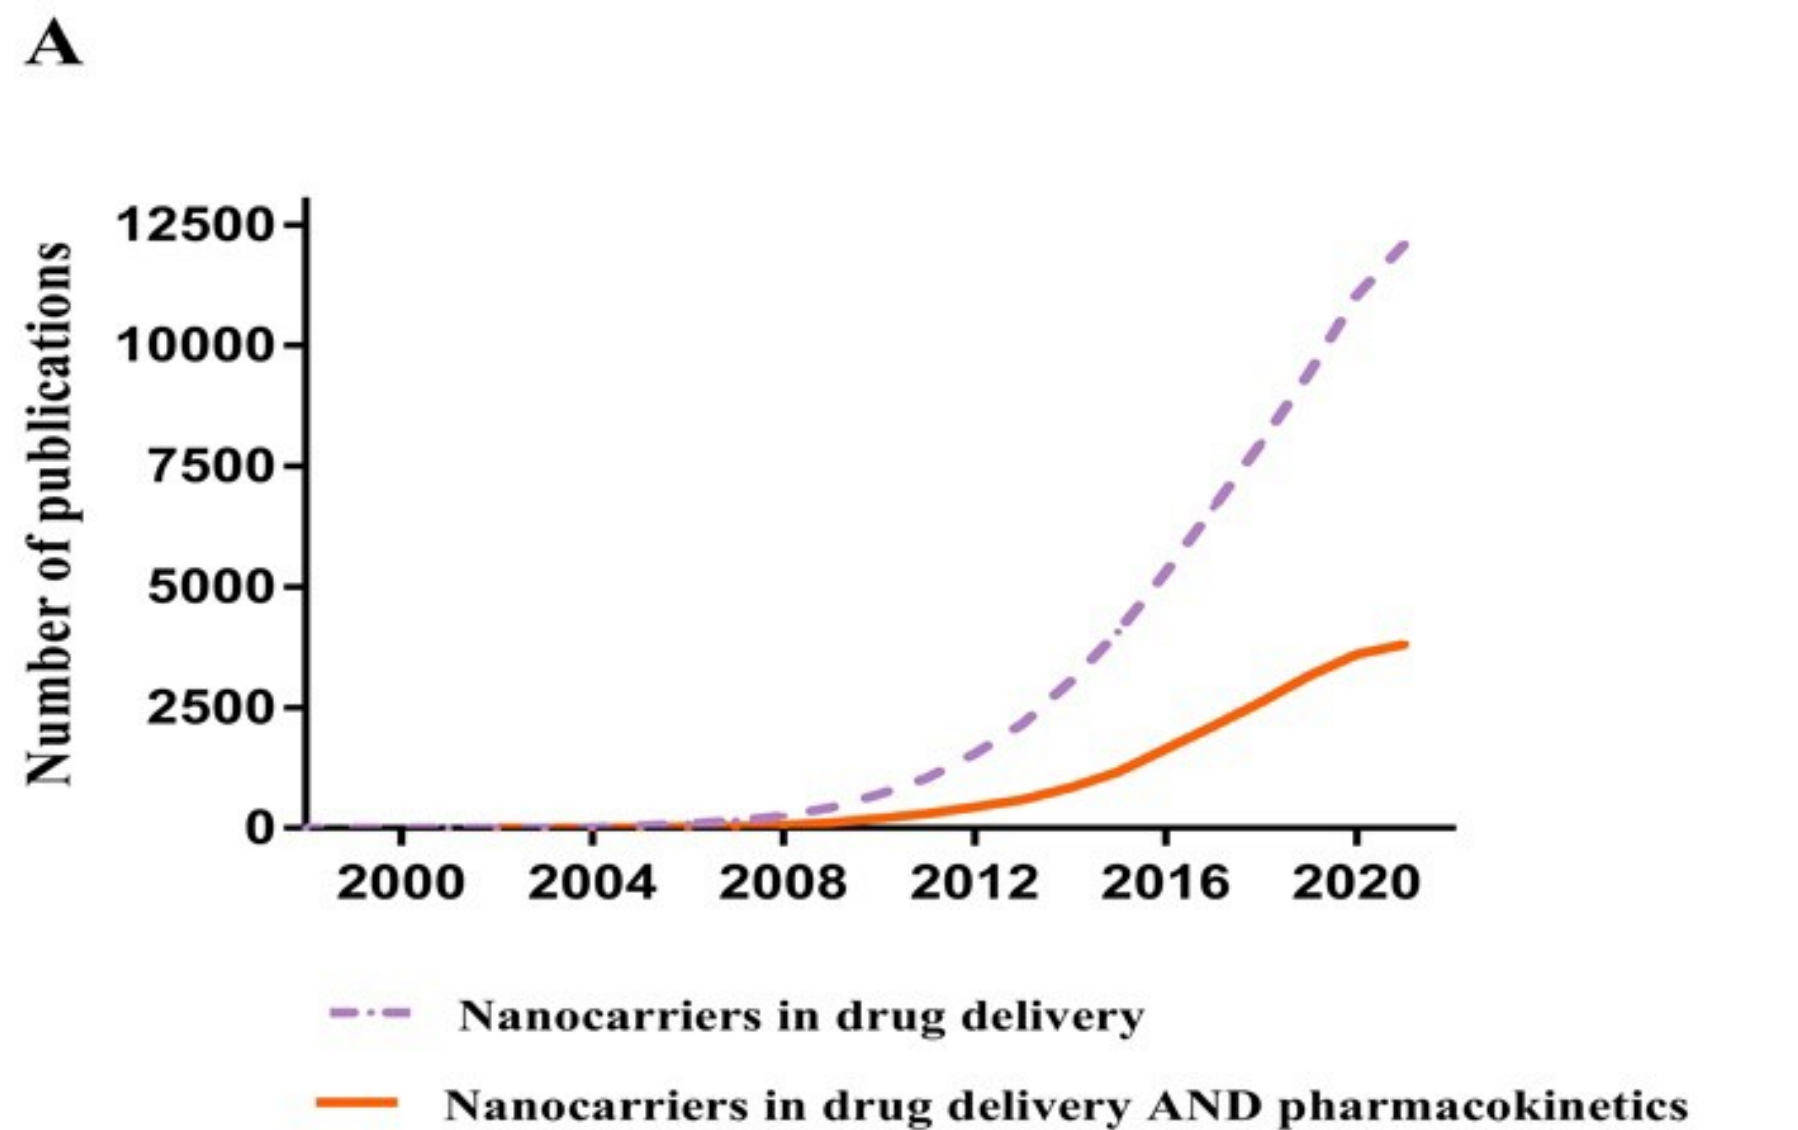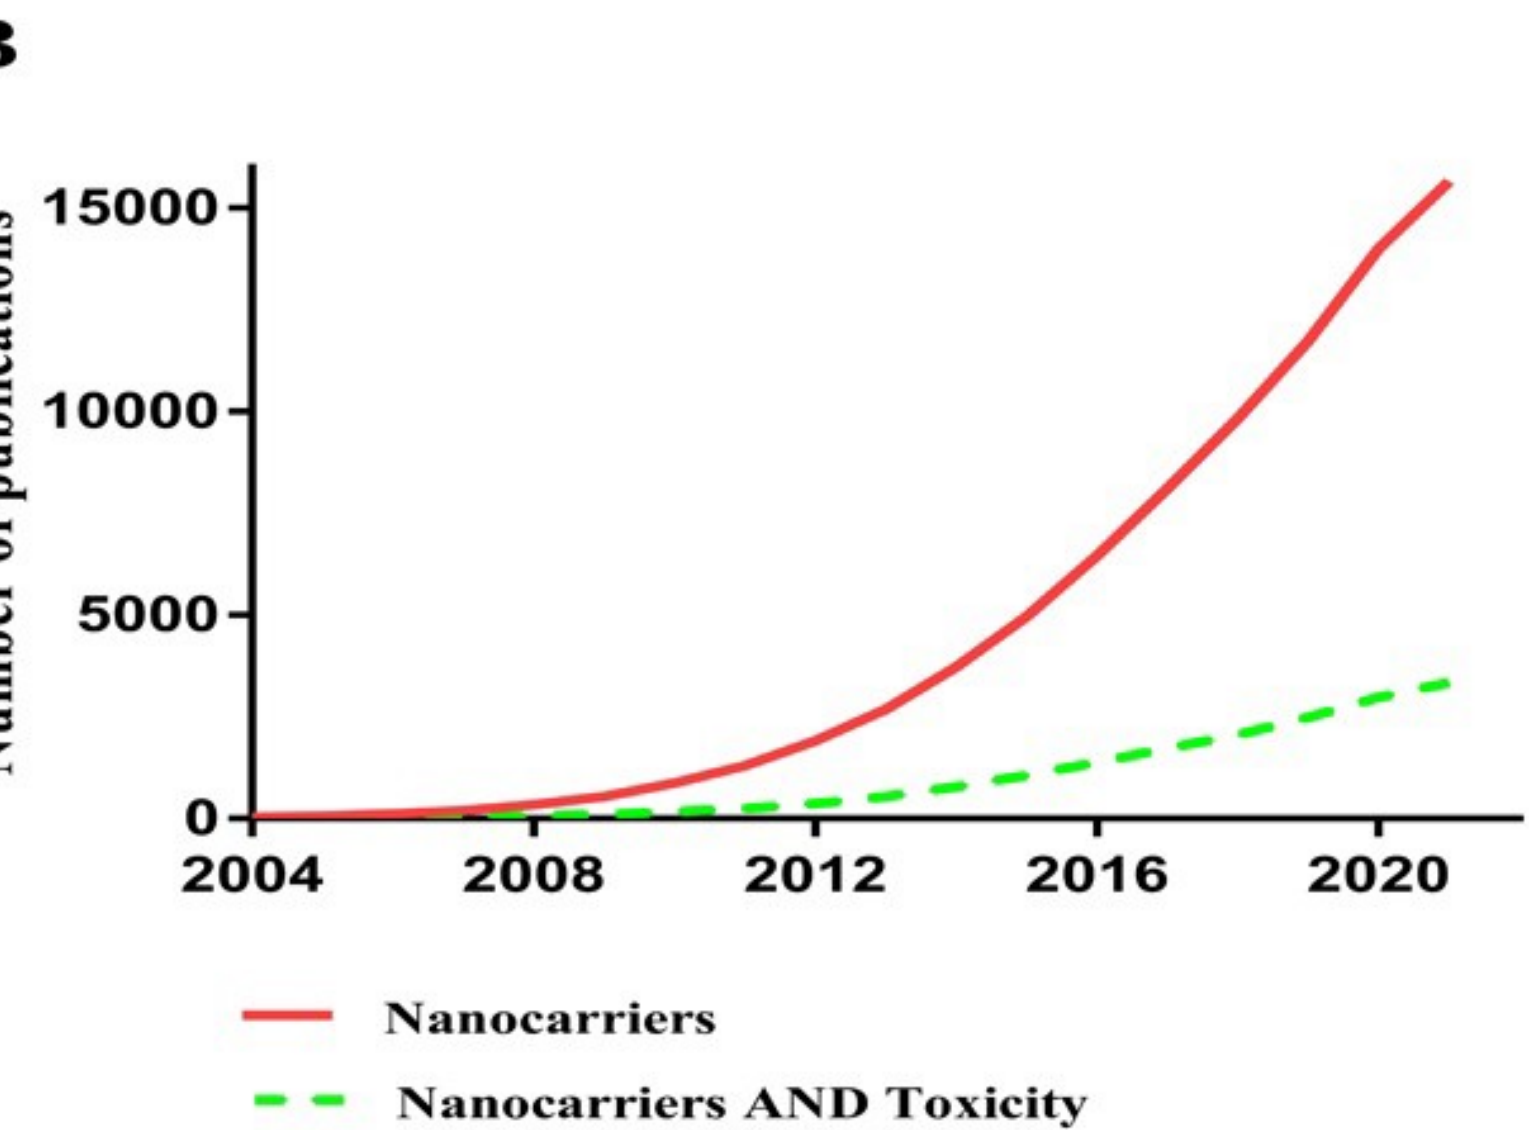

**C** Pharmaceutical applications of nanocarriers

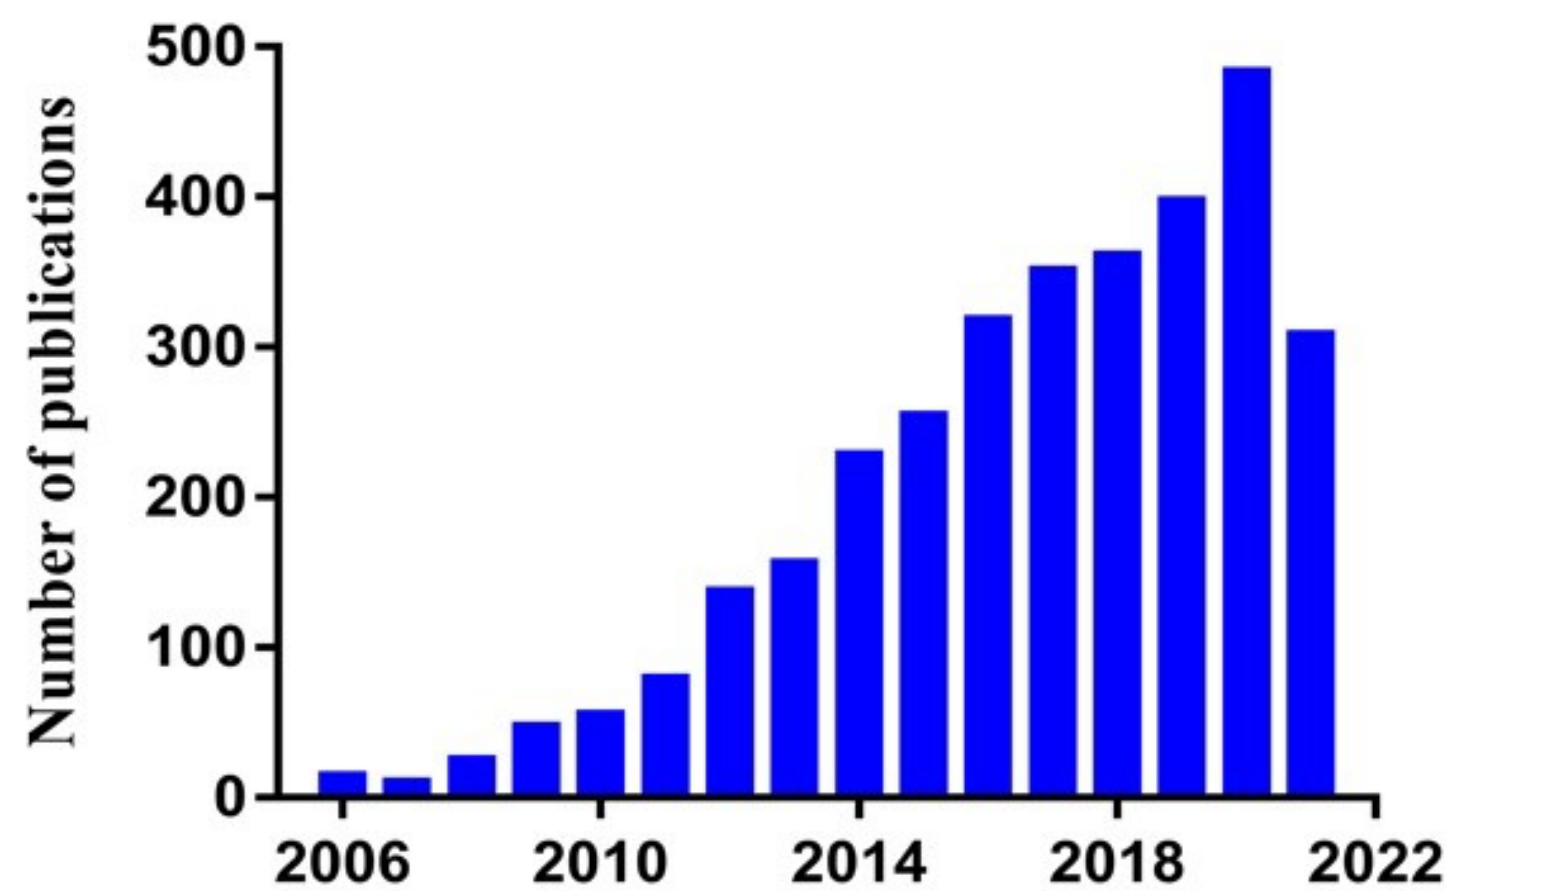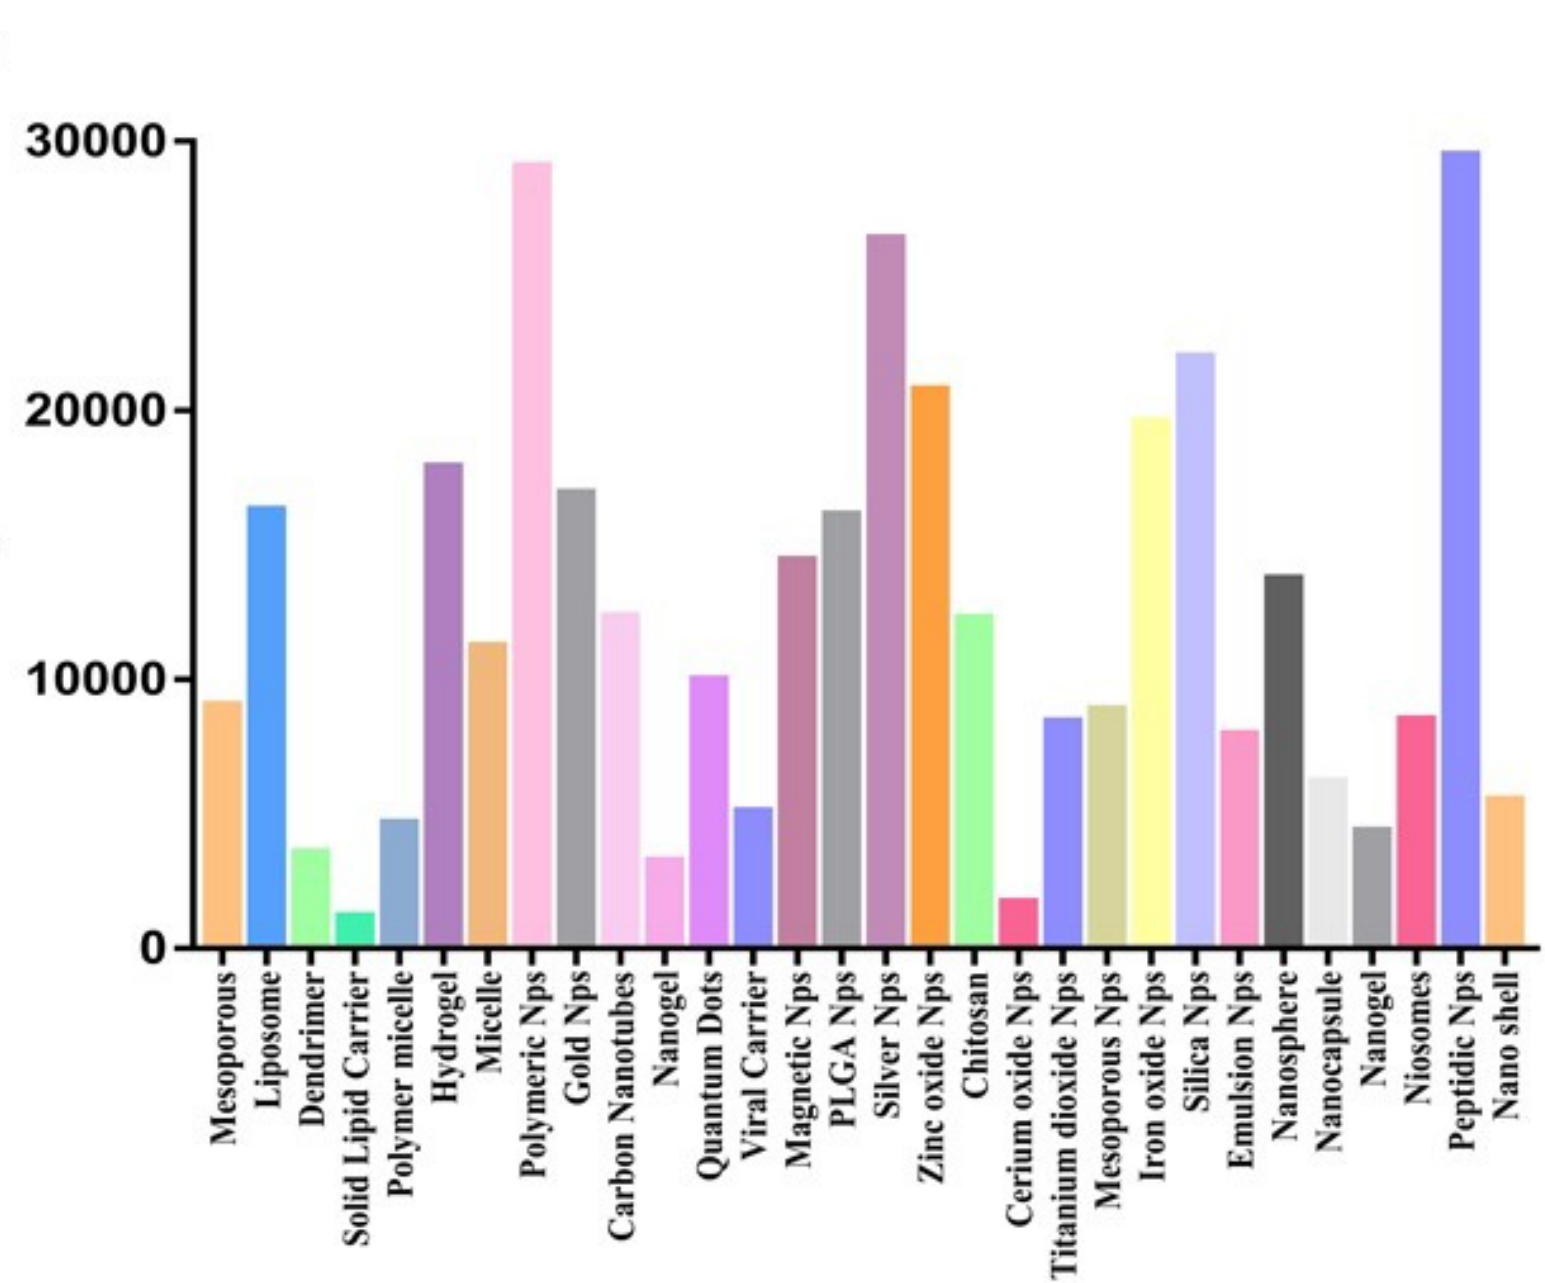

Supplement: d2tb02001g1.pdf [file d2tb02001g1.pdf]
